# Supplementary material for: Benefits of specialist severe asthma management: demographic and geographic disparities
Source: PubMed Central journal article supplement (PMC9753476; doi:10.1183/13993003.00660-2022), 2022-12-15
Supplement: ERJ-00660-2022.Supplement.pdf [file ERJ-00660-2022.Supplement.pdf]

## Supplement

**Table E1 - Data completeness**

| <b>Characteristic</b>                   | <b>Baseline</b> | <b>Follow-up</b> |
|-----------------------------------------|-----------------|------------------|
| <b>Age at assessment</b>                | 1,140 (100%)    | N/A              |
| <b>Gender</b>                           | 1,140 (100%)    | N/A              |
| <b>Ethnicity</b>                        | 1,136 (99.6%)   | N/A              |
| <b>BMI</b>                              | 1,135 (99.6%)   | 903 (79.2%)      |
| <b>Smoking status</b>                   | 1,116 (97.9%)   | N/A              |
| <b>FEV<sub>1</sub></b>                  | 1,124 (98.6%)   | 955 (83.8%)      |
| <b>FVC</b>                              | 1,113 (97.6%)   | 911 (79.9%)      |
| <b>FEV<sub>1</sub>/FVC</b>              | 1,113 (97.6%)   | 910 (79.8%)      |
| <b>ACQ6</b>                             | 987 (86.6%)     | 929 (81.5%)      |
| <b>Exacerbations (Prior year)</b>       | 1,120 (98.3%)   | 1,101 (96.6%)    |
| <b>ED Attendance (Prior year)</b>       | 1,120 (98.3%)   | 1,089 (95.5%)    |
| <b>Hospital Admissions (Prior year)</b> | 1,127 (98.9%)   | 1,090 (95.6%)    |
| <b>Blood Eosinophil Count</b>           | 1,119 (98.2%)   | 705 (61.8%)      |
| <b>FeNO</b>                             | 898 (78.8%)     | 583 (51.1%)      |
| <b>IGE</b>                              | 1,100 (96.5%)   | N/A              |
| <b>mOCS</b>                             | 1,134 (99.5%)   | 1,138 (99.8%)    |
| <b>mOCS dose</b>                        | 637 (99.7%)     | 585 (99.7%)      |
| <b>ICS dose</b>                         | 1,062 (93.2%)   | N/A              |
| <b>Biologic Therapy</b>                 | NA              | 1,140 (100%)     |

**Figure E1** – Bar chart depicting the representative proportion of patients that achieved improvement across five patient outcomes\*

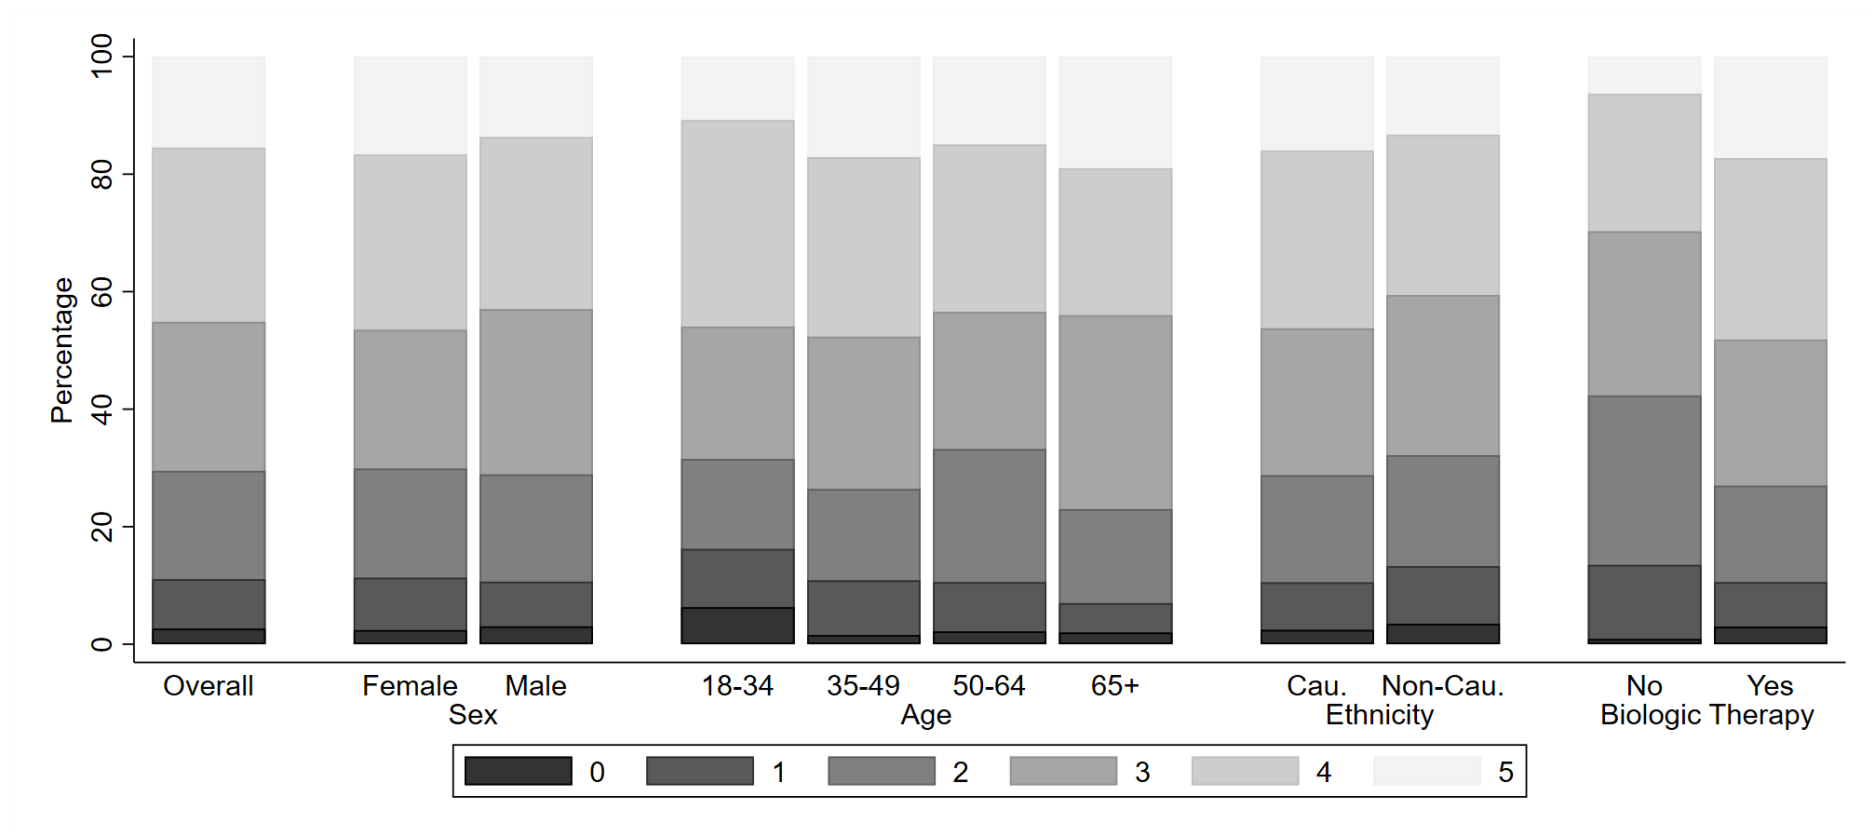

**\*Outcomes included:** ACQ improvement of 0.5 or greater or Well Controlled (ACQ  $\leq$  0.75), an exacerbation reduction  $\geq$  50% or No Exacerbations, a 50% or greater reduction in unscheduled care (ED attendance/hospitalisation) or No Unscheduled Secondary Care, an FEV<sub>1</sub> increase of 100ml or greater, an OCS dose reduction of 50% or greater (or not receiving OCS at follow-up appointment).

Abbreviation: Cau (Caucasian)

**Table E2 – Comparison of specialist referral benefit by demographic factors and biologic treatment status**

| Exposure                                      | ACQ6 Score <sup>a</sup> |                               |                    |             | Exacerbations <sup>b</sup> |                               |                  |             |
|-----------------------------------------------|-------------------------|-------------------------------|--------------------|-------------|----------------------------|-------------------------------|------------------|-------------|
|                                               | Univariate              | Multivariate<br>(No biologic) | Multivariate       | P-<br>Value | Univariate                 | Multivariate<br>(No biologic) | Multivariate     | P-<br>Value |
| <b>Sex</b>                                    | <b>N=1079</b>           | <b>N=1075</b>                 | <b>N=1075</b>      |             | <b>N=1140</b>              | <b>N=1136</b>                 | <b>N=1136</b>    |             |
| Female                                        | Ref                     | Ref                           | Ref                | .           | Ref                        | Ref                           | Ref              | .           |
| Male                                          | 0.24 (0.06,0.42)        | 0.24 (0.05,0.42)              | 0.26 (0.08,0.44)   | 0.004       | 0.83 (0.75,0.91)           | 0.83 (0.75,0.91)              | 0.84 (0.76,0.93) | 0.001       |
| <b>Age At First Assessment (Years) N=1079</b> |                         | <b>N=1075</b>                 | <b>N=1075</b>      |             | <b>N=1140</b>              | <b>N=1136</b>                 | <b>N=1136</b>    |             |
| 18-34                                         | Ref                     | Ref                           | Ref                | .           | Ref                        | Ref                           | Ref              | .           |
| 35-49                                         | -0.13 (-0.41,0.15)      | -0.13 (-0.41,0.15)            | -0.10 (-0.38,0.17) | 0.457       | 0.82 (0.72,0.94)           | 0.82 (0.72,0.94)              | 0.83 (0.73,0.95) | 0.008       |
| 50-64                                         | -0.01 (-0.27,0.25)      | -0.01 (-0.27,0.25)            | 0.02 (-0.23,0.28)  | 0.850       | 0.80 (0.71,0.91)           | 0.80 (0.71,0.91)              | 0.82 (0.72,0.92) | 0.001       |
| 65+                                           | 0.14 (-0.17,0.45)       | 0.14 (-0.17,0.45)             | 0.18 (-0.13,0.48)  | 0.258       | 0.63 (0.54,0.75)           | 0.63 (0.54,0.75)              | 0.65 (0.55,0.77) | 0.000       |
| <b>Ethnicity</b>                              | <b>N=1075</b>           | <b>N=1075</b>                 | <b>N=1075</b>      |             | <b>N=1136</b>              | <b>N=1136</b>                 | <b>N=1136</b>    |             |
| Caucasian                                     | Ref                     | Ref                           | Ref                | .           | Ref                        | Ref                           | Ref              | .           |
| Non-Caucasian                                 | -0.12 (-0.33,0.10)      | -0.12 (-0.33,0.10)            | -0.20 (-0.41,0.01) | 0.063       | 1.05 (0.93,1.18)           | 1.05 (0.93,1.18)              | 1.02 (0.91,1.15) | 0.732       |

  

| Exposure                                      | Unscheduled Care Use <sup>b</sup> |                               |                  |             | OCS Discontinuation <sup>c</sup> |                               |                  |             |
|-----------------------------------------------|-----------------------------------|-------------------------------|------------------|-------------|----------------------------------|-------------------------------|------------------|-------------|
|                                               | Univariate                        | Multivariate<br>(No biologic) | Multivariate     | P-<br>Value | Univariate                       | Multivariate<br>(No biologic) | Multivariate     | P-<br>Value |
| <b>Sex</b>                                    | <b>N=1139</b>                     | <b>N=1135</b>                 | <b>N=1135</b>    |             | <b>N=637</b>                     | <b>N=635</b>                  | <b>N=635</b>     |             |
| Female                                        | Ref                               | Ref                           | Ref              | .           | Ref                              | Ref                           | Ref              | .           |
| Male                                          | 0.94 (0.79,1.12)                  | 0.94 (0.79,1.12)              | 0.94 (0.79,1.12) | 0.489       | 1.04 (0.69,1.56)                 | 1.07 (0.71,1.62)              | 1.07 (0.71,1.62) | 0.751       |
| <b>Age At First Assessment (Years) N=1139</b> |                                   | <b>N=1135</b>                 | <b>N=1135</b>    |             | <b>N=637</b>                     | <b>N=635</b>                  | <b>N=635</b>     |             |
| 18-34                                         | Ref                               | Ref                           | Ref              | .           | Ref                              | Ref                           | Ref              | .           |
| 35-49                                         | 0.70 (0.57,0.85)                  | 0.70 (0.57,0.85)              | 0.70 (0.58,0.86) | 0.001       | 0.83 (0.41,1.66)                 | 0.81 (0.40,1.63)              | 0.80 (0.39,1.62) | 0.534       |
| 50-64                                         | 0.53 (0.44,0.65)                  | 0.54 (0.44,0.65)              | 0.53 (0.44,0.65) | 0.000       | 0.62 (0.33,1.17)                 | 0.62 (0.33,1.19)              | 0.62 (0.32,1.18) | 0.143       |
| 65+                                           | 0.45 (0.33,0.61)                  | 0.45 (0.33,0.61)              | 0.46 (0.34,0.62) | 0.000       | 0.68 (0.33,1.43)                 | 0.68 (0.32,1.42)              | 0.67 (0.32,1.42) | 0.297       |
| <b>Ethnicity</b>                              | <b>N=1135</b>                     | <b>N=1135</b>                 | <b>N=1135</b>    |             | <b>N=635</b>                     | <b>N=635</b>                  | <b>N=635</b>     |             |
| Caucasian                                     | Ref                               | Ref                           | Ref              | .           | Ref                              | Ref                           | Ref              | .           |
| Non-Caucasian                                 | 1.23 (1.03,1.46)                  | 1.23 (1.03,1.46)              | 1.21 (1.01,1.45) | 0.034       | 0.87 (0.45,1.69)                 | 0.89 (0.45,1.73)              | 0.90 (0.46,1.77) | 0.761       |

**Table E2 Footnote: Univariate analysis adjusts for hospital site, year of baseline assessment and time. Multivariate analysis (no biologic) adjusts for hospital site, year of baseline assessment, time, sex, age and ethnicity. Multivariate analysis adjusts for hospital site, year of baseline assessment, time, sex, age, ethnicity, and biologic therapy. All models included an interaction term between time and the variable of interest.**

<sup>a</sup> Mean difference; <sup>b</sup> Incidence rate ratio; <sup>c</sup> Odds ratio

**Figure E2** – OCS discontinuation, defined as complete withdrawal of OCS or remaining on 5mg or less at annual review, stratified by patient demographic variables and hospital site

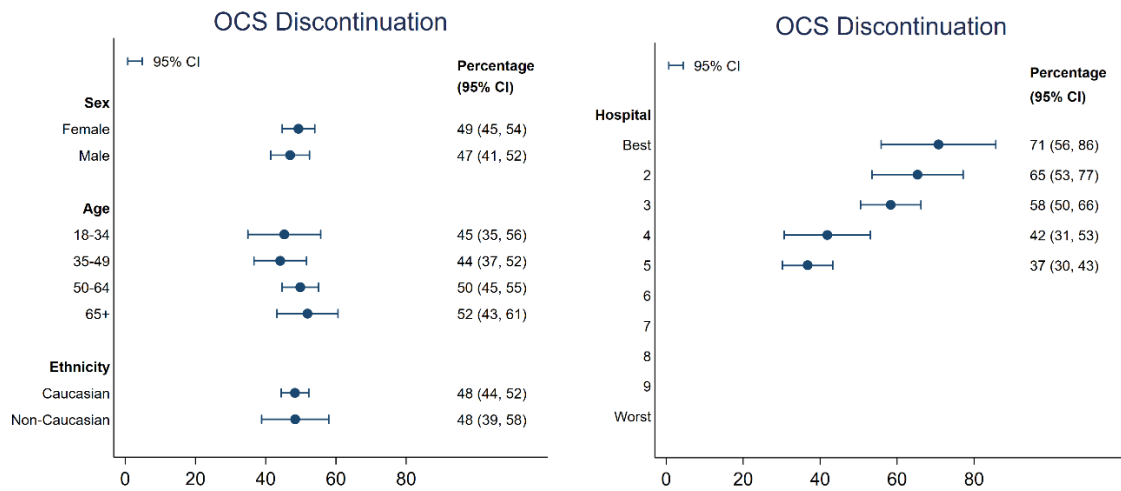

\*All models are adjusted for sex, age category, ethnicity, biologic therapy, year of baseline assessment, hospital site, and base level of the relevant outcome of interest

\*\*Analysis by site was restricted to hospitals with 30 or more patients per reported outcome.

\*\*\*The terms best and worst refer to the magnitude of change for each outcome measured and are not consistent across panels.

Abbreviation: OCS (Oral corticosteroids)

**Table E3 – Baseline patient characteristics stratified by age group at first assessment**

|                                                | <b>18-34</b>     | <b>35-49</b>     | <b>50-64</b>     | <b>65+</b>       | <b>P-value</b> |
|------------------------------------------------|------------------|------------------|------------------|------------------|----------------|
| <b>Number of Patients</b>                      | 189              | 300              | 461              | 190              |                |
| <b>Age At First Assessment (Years)</b>         | 26.9 (4.6)       | 43.4 (4.2)       | 56.5 (4.2)       | 70.9 (6.9)       | <0.001         |
| <b>Age of Onset (Years)</b>                    | 10.5 (8.3)       | 19.4 (13.6)      | 29.2 (18.5)      | 40.5 (22.5)      | <0.001         |
| <b>Gender</b>                                  |                  |                  |                  |                  | <0.001         |
| Female                                         | 142 (75.1%)      | 187 (62.3%)      | 270 (58.6%)      | 97 (51.1%)       |                |
| Male                                           | 47 (24.9%)       | 113 (37.7%)      | 191 (41.4%)      | 93 (48.9%)       |                |
| <b>Ethnicity</b>                               |                  |                  |                  |                  | 0.007          |
| Caucasian                                      | 152 (80.4%)      | 225 (75.3%)      | 366 (79.9%)      | 170 (89.5%)      |                |
| Non-Caucasian                                  | 37 (19.6%)       | 74 (24.7%)       | 92 (20.1%)       | 20 (10.5%)       |                |
| <b>BMI (kg/m2)</b>                             | 29.9 (7.9)       | 31.1 (7.5)       | 31.2 (6.9)       | 29.6 (5.4)       | 0.013          |
| <b>Smoking Status</b>                          |                  |                  |                  |                  | <0.001         |
| Never smoked                                   | 137 (74.5%)      | 197 (67.0%)      | 293 (64.8%)      | 129 (69.4%)      |                |
| Ex-smoker                                      | 31 (16.8%)       | 85 (28.9%)       | 150 (33.2%)      | 55 (29.6%)       |                |
| Current smoker                                 | 16 (8.7%)        | 12 (4.1%)        | 9 (2.0%)         | 2 (1.1%)         |                |
| <b>Atopic Disease</b>                          | 143 (75.7%)      | 187 (63.2%)      | 224 (49.0%)      | 74 (40.0%)       | <0.001         |
| <b>FEV1 (ml)</b>                               | 2416.6 (801.6)   | 2159.6 (805.7)   | 1845.1 (711.5)   | 1709.3 (621.6)   | <0.001         |
| <b>FEV1 (% Predicted)</b>                      | 70.3 (20.5)      | 67.1 (21.2)      | 64.3 (21.2)      | 67.7 (20.1)      | 0.008          |
| <b>FVC (ml)</b>                                | 3544.8 (934.2)   | 3348.7 (1061.6)  | 2979.5 (975.4)   | 2866.3 (954.6)   | <0.001         |
| <b>FVC (% Predicted)</b>                       | 87.7 (16.5)      | 84.0 (19.1)      | 82.1 (18.9)      | 87.1 (19.9)      | 0.001          |
| <b>FEV1/FVC</b>                                | 67.6 (13.4)      | 64.7 (13.7)      | 62.7 (23.6)      | 60.7 (13.9)      | 0.002          |
| <b>ACQ6 Score</b>                              | 3.3 (2.3,4.3)    | 3.2 (2.2,4.2)    | 3.0 (1.8,3.8)    | 2.3 (1.3,3.2)    | <0.001         |
| <b>Uncontrolled Asthma (ACQ6&gt;1.5)</b>       | 155 (90.6%)      | 214 (84.3%)      | 330 (82.9%)      | 112 (68.3%)      | <0.001         |
| <b>EuroQoL Utility</b>                         | 0.73 (0.46,0.89) | 0.74 (0.53,0.89) | 0.70 (0.43,0.85) | 0.78 (0.51,0.89) | 0.483          |
| <b>Exacerbations (Prior Year)</b>              | 6 (4,10)         | 5 (3,7)          | 4 (3,8)          | 5 (2,6)          | <0.001         |
| <b>Any ED Attendance (Prior Year)</b>          | 104 (55.9%)      | 129 (43.6%)      | 148 (33.0%)      | 54 (28.7%)       | <0.001         |
| <b>Any Hospital Admissions (Prior Year)</b>    | 96 (51.3%)       | 115 (38.9%)      | 156 (34.3%)      | 70 (37.0%)       | 0.008          |
| <b>Invasive Ventilations (Ever)</b>            | 31 (16.8%)       | 31 (10.5%)       | 47 (10.4%)       | 8 (4.3%)         | 0.016          |
| <b>Eczema</b>                                  | 11 (5.8%)        | 7 (2.3%)         | 6 (1.3%)         | 3 (1.6%)         | 0.006          |
| <b>Nasal Polyps</b>                            | 24 (12.7%)       | 54 (18.0%)       | 98 (21.3%)       | 35 (18.4%)       | 0.086          |
| <b>Gastro-oesophageal Reflux</b>               | 29 (15.3%)       | 50 (16.7%)       | 87 (18.9%)       | 41 (21.6%)       | 0.375          |
| <b>Depression or Anxiety</b>                   | 23 (12.2%)       | 33 (11.0%)       | 48 (10.4%)       | 5 (2.6%)         | 0.004          |
| <b>Blood Eosinophil Count (N/109L)</b>         | 0.40 (0.20,0.60) | 0.41 (0.20,0.70) | 0.33 (0.20,0.60) | 0.31 (0.15,0.55) | 0.009          |
| <b>Highest Blood Eosinophil Count (N/109L)</b> | 0.70 (0.40,1.10) | 0.70 (0.40,1.18) | 0.66 (0.40,1.00) | 0.68 (0.44,1.10) | 0.578          |
| <b>FeNO (ppb)</b>                              | 49 (21,87)       | 39 (20,75)       | 41 (25,69)       | 38 (19,63)       | 0.276          |
| <b>IGE (IU/mL)</b>                             | 204 (85,551)     | 152 (61,432)     | 147 (47,389)     | 145 (44,466)     | 0.013          |

|                                          |                  |                  |                  |                  |        |
|------------------------------------------|------------------|------------------|------------------|------------------|--------|
| <b>mOCS</b>                              | 79 (41.8%)       | 156 (52.3%)      | 294 (64.2%)      | 110 (58.2%)      | <0.001 |
| <b>mOCS (prednisolone equivalent/mg)</b> | 10 (10,20)       | 10 (10,20)       | 10 (8,15)        | 10 (5,10)        | <0.001 |
| <b>ICS Dose (BDP equivalent/ug)</b>      | 2000 (1600,2000) | 2000 (1600,2000) | 2000 (1600,2000) | 2000 (1600,2000) | 0.592  |
| <b>LAMA</b>                              | 111 (58.7%)      | 162 (54.4%)      | 254 (56.3%)      | 119 (63.3%)      | 0.098  |
| <b>Theophylline</b>                      | 45 (23.9%)       | 69 (23.2%)       | 129 (28.4%)      | 36 (18.9%)       | 0.075  |
| <b>Leukotriene Receptor Antagonists</b>  | 107 (59.4%)      | 148 (50.7%)      | 224 (49.7%)      | 89 (47.6%)       | 0.095  |
| <b>Maintenance Macrolides</b>            | 13 (7.2%)        | 12 (4.1%)        | 43 (9.4%)        | 14 (7.5%)        | 0.029  |
| <b>Nebuliser</b>                         | 42 (22.6%)       | 51 (17.0%)       | 102 (22.8%)      | 37 (19.8%)       | 0.029  |
| <b>Biologic Therapy</b>                  | 142 (75.1%)      | 242 (80.7%)      | 382 (82.9%)      | 161 (84.7%)      | 0.071  |
| <b>Biological Therapy Name</b>           |                  |                  |                  |                  | 0.048  |
| Mepolizumab                              | 71 (52.6%)       | 151 (64.0%)      | 260 (69.9%)      | 109 (69.4%)      |        |
| Benralizumab                             | 32 (23.7%)       | 49 (20.8%)       | 63 (16.9%)       | 33 (21.0%)       |        |
| Omalizumab                               | 31 (23.0%)       | 36 (15.3%)       | 48 (12.9%)       | 15 (9.6%)        |        |
| Dupilumab                                | 1 (0.7%)         | 0 (0.0%)         | 1 (0.3%)         | 0 (0.0%)         |        |

**Footnote: Abbreviations:** FEV1 (Forced expiratory volume in the first second), FVC (Forced vital capacity), ACQ6 (Asthma Control Questionnaire 6), ED (Emergency Department), FeNO (Fractional exhaled nitric oxide), IGE (Immunoglobulin E), mOCS (Maintenance oral corticosteroids), ICS (Inhaled corticosteroids), LAMA (Long-acting muscarinic antagonists), SABA (Short-acting beta-agonists)
